# Supplementary material for: Genome-Wide Analysis of the RAV Transcription Factor Genes in Rice Reveals Their Response Patterns to Hormones and Virus Infection
Source: MDPI journal article supplement (doi:10.3390/v13050752), 2021-04-25
Supplement: s1 [file s1]

Table S1. List of primers used for relative expression level

| Gene    | Primer       | Primer sequence       |
|---------|--------------|-----------------------|
| OsUBQ   | RT-UBQ5-2F   | ACCACTTCGACCGCCACTACT |
|         | RT-UBQ5-2R   | ACGCCTAAGCCTGCTGGTT   |
| OsRAV1  | RT-OsRAV1-F  | CATGTTCGAGAAGGTGGTGAC |
|         | RT-OsRAV1-R  | CCTTGGTGATGACGTAGCTCT |
| OsRAV2  | RT-OsRAV2-F  | GCACATGTTTGAGAAGGTCGT |
|         | RT-OsRAV2-R  | TTGGTCATCACGTAGCTCTGG |
| OsRAV3  | RT-OsRAV3-F  | CACATGTTCGACAAGGTGGT  |
|         | RT-OsRAV3-R  | TGGTCATCACGTAGCTCTGG  |
| OsRAV4  | RT-OsRAV4-F  | ACATGTTCGACAAGGTGGTGA |
|         | RT-OsRAV4-R  | TCGAGTCGCTTCTCCTTGAC  |
| OsRAV5  | RT-OsRAV5-F  | CGACTTCCGCAACATCAACC  |
|         | RT-OsRAV5-R  | GGTGCACCGTAATGTGGAGT  |
| OsRAV6  | RT-OsRAV6-F  | AGGCGAGAGATCCCCTTCAT  |
|         | RT-OsRAV6-R  | ACTTCTCGGCGTACTGCTTC  |
| OsRAV7  | RT-OsRAV7-F  | ATGATCACGGGGACATGCAC  |
|         | RT-OsRAV7-R  | GCAGACATGGCAGCATAGGA  |
| OsRAV8  | RT-OsRAV8-F  | AGCCGATTTCGTGAGGGAGAA |
|         | RT-OsRAV8-R  | TCTTGTCTCCGGCGATGTCA  |
| OsRAV9  | RT-OsRAV9-F  | CGGCGACACCATAGTCTTCT  |
|         | RT-OsRAV9-R  | CGCTGATGAACCACGCATTG  |
| OsRAV10 | RT-OsRAV10-F | AGCACGTCGGGAAACTACTG  |
|         | RT-OsRAV10-R | CGTGAATGCGATGCGATGTT  |
| OsRAV11 | RT-OsRAV11-F | TCCGCAAGCACACCTACTTC  |
|         | RT-OsRAV11-R | TGCTGCTTCGGTATGACGAG  |
| OsRAV12 | RT-OsRAV12-F | GACGTCGGGAAGCTGAACC   |
|         | RT-OsRAV12-R | GCTGTTCCAGTAGGAGTACCG |
| OsRAV13 | RT-OsRAV13-F | CAGAGCTACGTGCTCACCAA  |
|         | RT-OsRAV13-R | GGCATATGAATTGGCAGGGC  |
| OsRAV14 | RT-OsRAV14-F | TGTTGGATTTGTCGGGCTGT  |
|         | RT-OsRAV14-R | AGGCAGTAAACAGGCAGGTC  |
| OsRAV15 | RT-OsRAV15-F | TGGTGGGTCTTCAATCTGGC  |
|         | RT-OsRAV15-R | TTGGTGGCGTCTCTATCGTG  |

Table S2. Properties of the maize RAV proteins identified, including sequence ID and predicted sequence length.

| number | Gene ID number      | Amino acid residues | B3 domain | AP2 domain |
|--------|---------------------|---------------------|-----------|------------|
| 1      | Zm00001d039907_T001 | 378                 | 186-282   | 74-130     |
| 2      | Zm00001d035903_T001 | 224                 | 26-121    |            |
| 3      | Zm00001d043782_T001 | 389                 | 213-330   | 77-134     |
| 4      | Zm00001d024103_T001 | 224                 | 26-121    |            |
| 5      | Zm00001d023446_T001 | 283                 | 41-133    |            |
| 6      | Zm00001d010077_T001 | 259                 | 40-125    |            |
| 7      | Zm00001d047359_T001 | 277                 | 32-128    |            |
| 8      | Zm00001d011639_T001 | 405                 | 212-308   | 81-137     |
| 9      | Zm00001d051471_T001 | 420                 | 84-173    |            |
| 10     | Zm00001d029749_T001 | 273                 | 30-127    |            |
| 11     | Zm00001d048815_T001 | 232                 | 40-122    |            |
| 12     | Zm00001d052591_T001 | 307                 | 43-140    |            |
| 13     | Zm00001d017618_T001 | 422                 | 101-188   |            |
| 14     | Zm00001d038907_T001 | 406                 | 206-313   | 73-134     |
| 15     | Zm00001d052591_T002 | 305                 | 43-140    |            |

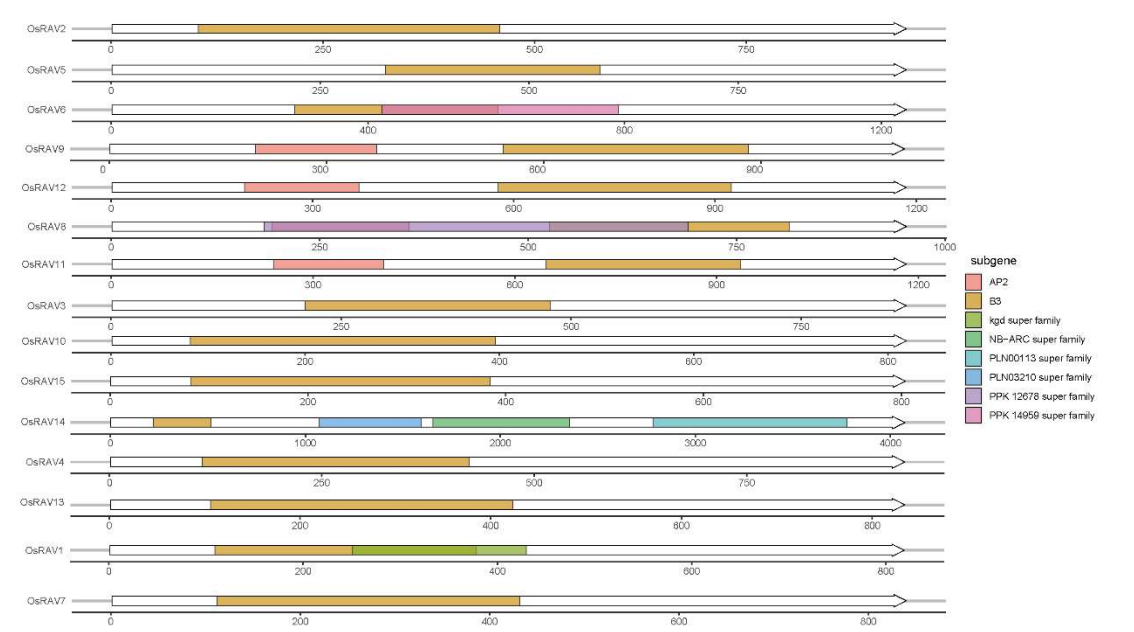

Figure S1 Architecture of conserved protein motifs in RAV genes from rice. The AP2 domains were highlighted by pink boxes and the B3 domain by light yellow boxes. The motifs, numbers 3–8, were displayed in different colored boxes. The sequence information for each motif is provided in the attached file. Protein and gene length can be estimated using the bottom ratio.
